# Supplementary material for: Proteomic analysis of chromophobe renal cell carcinoma and benign renal oncocytoma biopsies reveals shared metabolic dysregulation
Source: Springer Nature journal article supplement (doi:10.1186/s12014-023-09443-8), 2023-11-28
Supplement: MOESM1 [file 12014_2023_9443_MOESM1_ESM.pdf]

**Additional file 1: Table S1.** Description of human kidney biopsies used in the study.

| <b>BIOPSY</b> | <b>AGE</b> | <b>GENDER</b> | <b>DIAGNOSIS*</b> | <b>SAMPLE TYPE*</b> |
|---------------|------------|---------------|-------------------|---------------------|
| <b>N1</b>     | 54         | Male          | RCC               | NAT                 |
| <b>N2</b>     | 49         | Female        | Papillary         | NAT                 |
| <b>N3</b>     | 58         | Female        | RCC               | NAT                 |
| <b>N4</b>     | 72         | Female        | RCC               | NAT                 |
| <b>N5</b>     | 70         | Male          | RCC               | NAT                 |
| <b>C6</b>     | 73         | Male          | RCC               | chRCC               |
| <b>C7</b>     | 67         | Female        | RCC               | chRCC               |
| <b>C8</b>     | 71         | Male          | RCC               | chRCC               |
| <b>C9</b>     | 58         | Female        | RCC               | chRCC               |
| <b>C10</b>    | 81         | Male          | RCC               | chRCC               |
| <b>O11</b>    | 80         | Male          | RCC               | RO                  |
| <b>O12</b>    | 69         | Female        | RCC               | RO                  |
| <b>O13</b>    | 63         | Male          | RCC               | RO                  |
| <b>O14</b>    | 62         | Female        | RCC               | RO                  |
| <b>O15</b>    | 55         | Female        | RCC               | RO                  |

\*RCC: renal cell carcinoma; NAT: normal adjacent tissue; chRCC: chromophobe renal cell carcinoma; RO: renal oncocytoma
